# 1 **Coral settlement and recruitment responses to reef fish** 2 **foraging and trait diversity**

3 Cher F Y Chow<sup>1</sup>, Caitlin Bolton<sup>1</sup>, Nader Boutros<sup>3</sup>, Viviana Brambilla<sup>1</sup>, Luisa Fontoura<sup>4</sup>,  
4 Andrew S Hoey<sup>2</sup>, Joshua S Madin<sup>5</sup>, Oscar Pizarro<sup>3</sup>, Damaris Torres-Pulliza<sup>5,6</sup>, Rachael M  
5 Woods<sup>6</sup>, Kyle J A Zawada<sup>7</sup>, Miguel Barbosa<sup>1,8</sup>, Maria Dornelas<sup>1</sup>

## 7 **Author affiliations and addresses**

- 8 1. Centre for Biological Diversity, Scottish Oceans Institute, School of Biology,  
9 University of St Andrews, UK
- 10 2. ARC Centre of Excellence for Coral Reef Studies, James Cook University,  
11 Townsville, Queensland, Australia
- 12 3. Australian Centre for Field Robotics, University of Sydney, Sydney, New South  
13 Wales, Australia
- 14 4. Department of Environmental Sciences, Faculty of Science and Engineering,  
15 Macquarie University, Sydney, NSW, Australia
- 16 5. Hawai'i Institute of Marine Biology, University of Hawai'i at Mānoa, Kāne'ohe, HI,  
17 USA
- 18 6. Department of Biological Sciences, Macquarie University, Sydney, New South Wales,  
19 Australia
- 20 7. Centre for Compassionate Conservation, School of Life Sciences, University of  
21 Technology Sydney, Ultimo, New South Wales, Australia
- 22 8. Department of Biology & CESAM, University of Aveiro, Aveiro, Portugal

## 24 **Communicating author**

25 Cher F Y Chow

26 Email address: [fycc1@st-andrews.ac.uk](mailto:fycc1@st-andrews.ac.uk), [cher.fyc@gmail.com](mailto:cher.fyc@gmail.com)

## 28 **Keywords**

29 Reef fish, trait diversity, foraging impact, recruitment dynamics, herbivory

## 30 **Abstract**

31 The process of coral recruitment is crucial to the healthy functioning of coral reef ecosystems,  
32 as well as recovery following disturbances. Fishes are key modulators of this process by  
33 feeding on algae and other benthic taxa that compete with corals for benthic space. However,  
34 foraging strategies within reef fish assemblages are highly diverse and the effect of foraging  
35 diversity on coral recruitment success remains poorly understood. Here, we test how the  
36 foraging traits of reef fishes affect coral settlement and juvenile success at Lizard Island, Great  
37 Barrier Reef. Using a multi-model inference approach incorporating six metrics of fish  
38 assemblage foraging diversity (foraging rates, trait richness, trait evenness, trait divergence,  
39 herbivore abundance, and benthic invertivore abundance), we found that herbivore abundance  
40 had positive effects on both coral settlement and recruitment success. However, foraging trait  
41 diversity had a negative effect on coral settlement but not on recruitment. Coral settlement was  
42 higher at sites with less trait diverse fish assemblages, specifically in trait divergence and  
43 richness. Moreover, these two trait diversity metrics were stronger predictors of coral  
44 settlement success compared to herbivore abundance. Our findings provide evidence that  
45 impacts mediated by fish foraging on coral juveniles can potentially be harmful during  
46 settlement, but the space-clearing effect overall remains advantageous. We show here that the  
47 variation of fish biodiversity across reefs can be a partial driver to spatially uneven patterns of  
48 coral recruitment and reef recovery.

## 49 **Introduction**

50 In recent years, massive thermal bleaching and tropical cyclones associated with climate  
51 change have affected coral reefs worldwide with increasing frequency and severity (Hughes et

52 al. 2017, 2018; Eakin et al. 2019; Skirving et al. 2019). The recovery of coral populations and  
53 assemblages after these disturbances is dependent on the recruitment of corals, which have  
54 been highly heterogeneous across space, both at local and regional scales (Roff and Mumby  
55 2012; Holbrook et al. 2018; Hughes et al. 2019; Mellin et al. 2019). Comparisons between  
56 coral recruitment outcomes under grazing conditions point to fish assemblages as an important  
57 determinant of recovery trajectories due to the suppression of benthic competitors with corals  
58 through their foraging (Korzen et al. 2011; Graham et al. 2015; Kuempel and Altieri 2017).  
59 Here, we further examine how variation and diversity in fish assemblages affect coral  
60 settlement and recruitment success.

61 Dynamics at the early life stages of coral settlement and recruitment are critical bottlenecks in  
62 the recovery of reef coral assemblages from disturbances (Ritson-Williams et al. 2009;  
63 Adjeroud et al. 2017). Both the settlement of planktonic larvae and their recruitment to the  
64 juvenile stage are marked by high mortality rates (Vermeij and Sandin 2008). Successful coral  
65 settlement requires optimum water flow conditions as well as available substrate space  
66 (Chadwick and Morrow 2011; Hata et al. 2017), whereas factors for recruitment success  
67 involve not only competition with other benthic organisms but also light availability and  
68 avoiding predation (Doropoulos et al. 2016). Coral juveniles not only have to land upon  
69 available space during settlement but also must survive within that space post-settlement to  
70 reach the life stage of recruitment.

71 Algae are prevalent competitors for space and resources in both coral settlement and  
72 recruitment. They are able to proliferate quickly in response to space availability, as  
73 demonstrated by rapid colonisation of algae following massive coral community mortalities

74 (McCook et al. 2001; Kuffner et al. 2006; Diaz-Pulido et al. 2010). Because of this  
75 opportunistic growth, algae can dominate coral reefs by inhibiting coral replenishment  
76 (Hughes 1994; McClanahan et al. 2001; Rogers and Miller 2006; Bruno et al. 2009; Bozec et al.  
77 2019). The ability of reefs to suppress algae overgrowth has largely been attributed to foraging  
78 by herbivorous reef fishes (Graham et al. 2013; Kuempel and Altieri 2017; Manikandan et al.  
79 2017; Dajka et al. 2019), which collectively have been estimated to consume up to 65% of net  
80 primary productivity on a reef (Polunin and Klumpp 1992). By suppressing the standing  
81 biomass of algae, herbivorous fishes are often considered indirect facilitators of coral  
82 settlement and recruitment (Bellwood et al. 2006; Hughes et al. 2007; Chong-Seng et al. 2014;  
83 Doropoulos et al. 2017).

84 The foraging impact from fishes on the benthic assemblage is mediated by their behavioural  
85 and physical characteristics (functional traits). Not all bites are equal, and trait-driven variation  
86 in foraging impacts can be assessed at two scales: among species and among assemblages.  
87 Foraging impacts among species vary according to traits such as food selectivity, jaw  
88 morphology, and biting mode, which are often summarised in functional groupings especially  
89 for herbivorous fishes (Mantyka and Bellwood 2007; Green and Bellwood 2009; Michael et al.  
90 2013; Streit et al. 2015, 2019). However, other benthic taxa (e.g. sponges) also compete with  
91 corals and point to the need to consider the effects of other benthic foragers on coral settlement  
92 and survival (Elliott et al. 2016; Madduppa et al. 2017). It is not yet clear what, if any, effect  
93 invertivores have on coral settlement and recruitment. Demersal invertivorous fishes may lend  
94 a similar effect as herbivores to corals by suppressing other benthic competitors, such as  
95 sponges and soft corals.

96 Foraging impacts vary with species traits, therefore impacts delivered collectively by a fish  
97 assemblage also vary according to the distribution and composition of these traits (Cheal et al.  
98 2010). The species and trait composition of fish assemblages vary widely across space in coral  
99 reefs, depending on structural complexity of the habitat and environmental gradients (Cheal et  
100 al. 2012; Darling et al. 2017; Richardson et al. 2017; Bach et al. 2019). The trait variation  
101 within an assemblage results in highly differentiated strategies between species (trait  
102 complementarity) or similar overlapping strategies (trait redundancy). Foraging trait  
103 complementarity between specialist species has been shown to be most effective at reducing  
104 algal cover for coral juveniles (Burkepile and Hay 2008, 2011). It is unclear how variation in  
105 fish assemblage foraging-relevant traits links with spatial patterns in coral recruitment.  
106 Furthermore, trait diversity effects in foraging impacts on coral juveniles have not yet been  
107 assessed outside of more simplistic approaches that assess effects related to functional  
108 groupings as a proxy of traits (Brandl et al. 2019).

109 Here, we test an overarching hypothesis that spatial variation in fish assemblage trait diversity  
110 links positively with variation in coral settlement and subsequent recruitment to the juvenile  
111 population. Specifically, we test whether greater herbivore abundance, benthic forager  
112 abundance, and foraging rates facilitate coral settlement and recruitment. Given previous  
113 findings on positive species diversity effects on herbivory (Burkepile and Hay 2008; Rasher et  
114 al. 2013) in addition to the positive scaling of trait richness with species richness, we also  
115 hypothesise that assemblages that are more trait diverse promote coral settlement and  
116 recruitment.

117

## 118 **Materials and methods**

### 119 Study location

120 We conducted our study at seven sites (1.4–3.7 m depth) representative of the variation in  
121 topography and abiotic substrate within a no-take marine national park zone at Lizard Island  
122 (14°40' S, 145°28' E) in the northern Great Barrier Reef, Australia (Figure 1). Recent coral  
123 mortalities from thermal bleaching and cyclone damage observed at the island (Madin et al.  
124 2018; Hughes et al. 2019) made this an opportune time and location to investigate coral  
125 settlement and recruitment dynamics post-disturbance. Data collection took place during early  
126 austral summer surrounding the annual spawning event, from November-January. Coral data  
127 were collected in 2018-19 and 2019-20, and fish assemblage data were collected in 2019-20.

### 128 Remote underwater videos

129 We obtained fish assemblage and bite data from unbaited remote underwater videos (RUVs),  
130 using an adaptation of baited remote underwater video methods (Langlois et al. 2018). At each  
131 site, we deployed a single waterproof camera (GoPro Hero4 Session on a wide setting) in  
132 acrylic housing on an abiotic substrate. We placed markers at a 2 m radius from the camera lens,  
133 establishing a sampling area of approximately 4 sq m with a camera field of view measuring  
134 118°. Deployment lasted for a total of 45 minutes at each site, with the first 15 minutes omitted  
135 from processing to avoid diver and boat presence influencing observations.

136 We processed videos in two iterations, the first to count and identify individual fish within the  
137 marked sampling area to species level or lowest possible taxon when possible, and the second  
138 to enumerate foraging rates. Observation records where we could not identify to the genus level  
139 with certainty were omitted from analysis. To reduce potential bias of double counting resident  
140 fish, we identified recurring individuals if one of the same species and relative size had been

141 previously observed in the same video area with similar behaviours. For bite data, we recorded  
142 total bites and length class of the individual fish biting. We used visual estimation for fish  
143 length classifications (< 5 cm, 5–9 cm, 10–19 cm, 20–29 cm, and so on in 10 cm intervals  
144 inclusive). We then recorded total in-frame occurrence time for all species at the site observed  
145 biting at least once, regardless of the behaviour during the occurrence. Unlike processing for  
146 fish assemblage structure, this bite observation did not distinguish between individuals.

147

#### 148 Coral settlement and recruitment

149 To quantify coral settlement, we sampled settling coral spat using experimental substrates in  
150 the summers of 2018-19 and 2019-20. In both years, six unglazed clay tiles (11 × 11 cm) were  
151 deployed horizontally onto permanent mountings installed at each site ( $n = 42$ ). We deployed  
152 tiles one week before predicted coral spawning to allow for establishment of biofilms and  
153 crustose coralline algae that reflect the natural conditions of available hard substrate on a reef  
154 (Heyward and Negri 1999). We collected tiles after two months and subsequently bleached and  
155 dried them for inspection under dissection microscope to enumerate coral spat.

156 We counted coral recruits *in situ* aided by georeferenced orthomosaic reconstructions of 100  
157 m<sup>2</sup> reef areas (“reef records”) at each site. Recruits were defined as new colonies which were  
158 not fragments of previous colonies and had  $\leq 5$  cm in diameter (Bak and Engel 1979). These  
159 orthomosaics were produced from photogrammetric models following the pipeline of Pizarro  
160 et al. (2017) as adapted by Torres-Pulliza et al. (2020). We divided orthomosaics into quadrants  
161 for each site ( $n = 28$ ), which were then annotated *in situ* with location and identification for all

162 recruit and adult coral colonies. We identified recruits in 2019 by comparing annotation  
163 changes from 2018.

164

#### 165 Fish assemblage predictor variables

166 We compiled six foraging traits for the fish species observed in RUVs. These traits were  
167 selected to represent assemblage diversity with respect to foraging ecology, interactions with  
168 substrate, substrate impact, and foraging range (Table 1). We extracted trophic and diet data  
169 from FishBase using the rfishbase R package (version 3.0.4; Boettiger et al., 2012). For the  
170 traits of water column position of foraging (benthic, demersal, pelagic/mid-water), we  
171 allocated values based on FishBase diet information. If a majority of food items within the diet  
172 were specified to be benthic substrata or zoobenthos, we assigned a category of benthic  
173 foraging. Where diets consisted of a minority food items found on the benthos, we classified as  
174 demersal. Exclusive planktivores and piscivores we assigned as mid-water/pelagic foragers.  
175 Foraging mode groupings were based on the classifications outlined by Green and Bellwood  
176 (2009), Cheal et al. (2010), and Stuart-Smith et al. (2013). Details on assigning foraging mode  
177 categories are described in the supplementary material.

178 Following classification of fish species functional groupings, we calculated the relative  
179 abundance of herbivores and benthic foragers (i.e. benthic-foraging detritivores, omnivores,  
180 and invertivores) for assemblages at each site.

181



182 Trait diversity analysis

183 To assess and compare the foraging trait diversity of fish assemblages, we generated three  
184 complementary indices of 1) trait richness via the trait onion peeling index (TOP; Fontana et al.  
185 2016), 2) trait evenness, and 3) trait divergence (see Villéger et al. 2008) from a global trait  
186 space. TOP quantifies the volume of the trait space filled by the assemblage, where higher  
187 measures indicate that the assemblage occupies more trait space and hence more trait rich. This  
188 metric is equivalent to convex hull volumes calculated by sequentially eliminating species at  
189 vertices, hence “onion peels” of convex hulls (Fontana et al. 2016; Legras et al. 2018). Trait  
190 evenness describes the variation in distance in the trait space between adjacent species, where  
191 higher measures of evenness mean that the abundance of species within an assemblage are  
192 more equally distributed throughout the trait space. Lastly, trait divergence measures the  
193 distribution of an assemblage relative to the trait space centroid and extremes. Higher trait  
194 divergence values reflect greater trait differentiation between species and therefore indicates an  
195 assemblage with very little trait overlaps or redundancy. Both evenness and divergence are  
196 weighted by species abundance.

197 Construction of the trait space was performed using Principal Coordinates Analysis (PCoA)  
198 based on Gower dissimilarities between all species observed in our study according to the six  
199 foraging traits (Villéger et al. 2008; Laliberté and Legendre 2010). The resulting principal  
200 coordinates represent new synthetic “traits” where multiple collinear traits are combined and  
201 represented by different axes. Ordered factor traits were handled using the Podani method  
202 (Podani 1999) and Cailliez corrections to conform the matrix to Euclidean space, which  
203 prevents the generation of negative eigenvalues during scaling (Legendre and Legendre 2012).

204 The resulting trait indices are orthogonal, and so correlation between any of these measures  
205 should not be due to mathematical artefacts but rather to characteristics of the assemblages  
206 (Mason et al. 2005). Dissimilarity calculations, trait space construction, trait evenness, and trait  
207 divergence calculations were all performed with the FD R package (Laliberté et al. 2014). TOP  
208 was calculated using code provided in Fontana et al. (2016).

209

### 210 Calculation of site-level foraging rates

211 We standardised bite counts by the total observation time for each species to give bite rates  
212 (bites  $\text{min}^{-1}$ ) for each length class at each site. As our goal was to calculate a foraging rate at the  
213 site-level from total bites observed, we did not standardize by number of biting fish. Bite rates  
214 were then aggregated by length class. To factor the difference in foraging impacts (i.e.  
215 substrate removal) due to trophic group, foraging mode, and water column position traits  
216 (Purcell and Bellwood 1993; Green and Bellwood 2009; Burkepile and Hay 2010; Hoey and  
217 Bellwood 2011), we calculated a species trait-based coefficient to scale bite rates (details in  
218 Supplementary Material). To factor the difference in foraging impacts due to differences in fish  
219 size (and hence bite sizes, see Adam et al. 2018; Hoey 2018), we scaled bite rates by the  
220 median length for individuals of each length class (e.g. 7.5 cm for length class 5–10 cm). We  
221 then obtained a foraging rate (bites-cm  $\text{min}^{-1}$ ) for each site following Equation 1, where  $S_i$  is  
222 the trait-based coefficient for species  $i$ ,  $L_{il}$  is the median length for individuals in length class  $l$   
223 of species  $i$ , and  $B_{il}$  the bite rate by length class and species for each study site. We refer to bite  
224 rates as foraging rates (in bites-cm  $\text{min}^{-1}$ ) after this scaling. Given the utility of this foraging  
225 rate for relative comparison and not for an objective quantity, we then scaled foraging rates by

226 their standard deviation to place it on a common effect size scale with other explanatory  
227 variables for ease of interpretation, as they were indices or proportions constrained between 0  
228 and 1.

### 229 **Equation 1**

$$230 \text{ ForagingRate} = \sum_i \left( S_i \sum_l L_{il} B_{il} \right)$$

231

### 232 Statistical modelling

233 We modelled coral settlement and recruitment through spat and recruit counts respectively as  
234 functions of six predictors that captured realised and potential foraging impact. Foraging rates  
235 represented realised foraging impacts while trait richness (TOP), evenness (TEve), divergence  
236 (TDiv), herbivore abundance (Herb), and benthic forager abundance (Benthic) represented  
237 potential foraging impacts. Site was included as a random intercept term to account for  
238 non-independence in same-site coral abundances (Equation 2 and 3). To determine the most  
239 parsimonious effect structure that captures settlement and recruitment patterns, we used a  
240 multi-model inference approach for the response variables of coral spats and recruits. We fitted  
241 a global generalised linear mixed model with negative binomial errors and log link function for  
242 each response variable using the lme4 package (version 1.1-23, Bates et al., 2015). The global  
243 model for coral recruits (Equation 3) also included coral spat abundance from the previous year  
244 (i.e. 2018-19) as an explanatory covariate to account for the effect of settlement on recruit  
245 abundances the year following. All above analyses were conducted in R 4.0.0 (R Core Team  
246 2020).

247

248 **Equation 2**

249  $\text{CoralSpat}_{ij} \sim \text{ForagingRate}_j + \text{TDiv}_j + \text{TEve}_j + \text{TOP}_j + \text{Herbivore}_j + \text{Benthic}_j + (1|\text{Site}_j)$

250 **Equation 3**

251  $\text{CoralRecruit}_{ijt} \sim \text{CoralSpat}_{j,t-1} + \text{ForagingRate}_{jt} + \text{TDiv}_{jt} + \text{TEve}_{jt} + \text{TOP}_j + \text{Herbivore}_j +$   
252  $\text{Benthic}_j + (1|\text{Site}_j)$

253

254 From these models, we constructed two sets of candidate models that varied in the combination  
255 of potential foraging impact fixed effects. We fitted null models with only site as a random  
256 effect for model comparison. We also fitted a second null model for coral recruitment with  
257 2018 spat as a fixed effect and site as a random intercept term. We ranked all candidates by  
258 Akaike Information Criterion values corrected for small sample sizes (AICc) for model  
259 selection (Burnham and Anderson 2002). Selection of the optimum coral spat and recruit  
260 models was based on the lowest AICc value (MuMIn package; Bartoń 2020). We also  
261 calculated AICc weights as estimates of the probability that each model is the optimum  
262 candidate. If top-ranked models were within a difference of 2 AICc, we selected the candidate  
263 with a greater AICc weighting.

264

265 **Results**

266 We identified a total of 624 individual fish from 104 species from a total 3.5 hours of video  
267 recordings. Fish abundance across the seven study sites ranged from 37 individuals at Turtle  
268 Beach to 210 at Southeast, with an overall mean of  $89 \pm 66$  individuals SD. The 104 species  
269 observed were dominated by herbivores (33%) and invertivores (29%). Overall the relative  
270 abundance of herbivores was  $32.5\% \pm 17.6\%$  SD and ranged from 8.1% in Turtle Beach to

271 62.4% in Southeast (Figure 2). Relative abundance of benthic foragers had a similar mean of  
272  $37.2\% \pm 7.56\%$  SD (Figure 2).

273

#### 274 Trait space and trait diversity metrics

275 The resulting four-dimensional global trait space captured 22.8% of the variation (i.e.  
276 proportional sum of eigenvalues; Figure S1a). Our validation of preserved trait space  
277 dissimilarities in the Mantel test returned a significant strong correlation ( $r = 0.801$ ,  $p < 0.01$ ;  
278 Figure S1b). Detritivores and corallivores were located toward the centre of the trait space in  
279 the first two dimensions (Figure S2 in Supplementary Material) while herbivores clustered  
280 tightly in the lower left corner and invertivores in the upper middle corner. In contrast, large  
281 differences in trait richness in the third and fourth dimensions were driven by solitary species  
282 with small active ranges and schooling species with large active ranges (Figure S3). Trait  
283 richness was relatively similar across sites apart from a notable outlier in Southeast (TOP =  
284 0.55), ranging from 0.25 at Vicki's to 0.34 at Lagoon (Figure 2). Southeast was primarily  
285 influenced by trait extreme species in all four dimensions (Figure 3.1), resulting in the lowest  
286 trait evenness measures (TEve = 0.71) and greatest trait divergence (TDiv = 0.91). In contrast,  
287 the assemblage at North Reef was abundant in centrally clustered species and hence the least  
288 trait divergent (TDiv = 0.71; Figure 2).

289

#### 290 Foraging rates

291 Only 35 fish species were observed biting the substrata. Resulting trait-weighted coefficients  
292 ranged from 0.05 for suction-feeding planktivores to 3.67 for excavator herbivores (Table S1).

293 Five dominant biting species contributed to more than 50% of the total foraging rates observed  
294 at sites: *Ctenochaetus striatus* (15.4%), *Chlorurus spilurus* (12.6%), *Hemigymnus melapterus*  
295 (8.9%), *Chlorurus microrhinos* (8.6%), and *Acanthurus nigrofuscus* (7.6%). Herbivores,  
296 mainly excavators and algal croppers, were the most intense foragers especially at the sites  
297 Corner Beach, North Reef, and Vicki's, even though they were not the most prevalent (Figure  
298 3).

299

### 300 Coral settlement and recruitment

301 Mean total spat abundance across sites was 21.29 spats in 2018-19 and 29 spats in 2019-20.  
302 Coral settlement was consistently low at Lagoon, Southeast, and Corner Beach (Figures 4-5),  
303 ranging from 3-18 total spats in 2018-19 and 8-14 in 2019-20. Coral recruitment was low at  
304 Lagoon (4.00 colonies  $\pm$  4.00 SD) and Turtle Beach (8.25 colonies  $\pm$  12.53 SD; Figures 4-5).  
305 Both coral settlement and recruitment in 2019-20 were highest at North Reef, where there was  
306 an average of 13.83 spats per settlement tile  $\pm$  6.52 SD (total of 83 spats) and 57.25 recruit  
307 colonies per site quadrant  $\pm$  21.69 SD (Figures 4-5).

308

### 309 Optimum predictors of coral settlement and recruitment

310 The fixed effect structure that best explained variation in coral settlement consisted of foraging  
311 rate, trait divergence, TOP, and herbivore abundance (Table 2). Although we identified strong  
312 negative correlation ( $r = -0.85$ ) between herbivore abundances and trait evenness in pairwise  
313 checks, trait evenness performed drastically poorly as a predictor of coral settlement. The  
314 candidate model that only differed from the optimum coral settlement model in replacing

315 herbivore abundance with evenness (foraging rates + TDiv + TOP + TEve) performed far  
316 worse ( $\Delta AICc = 6.21$ ; Table 2). Interestingly, coral settlement and recruitment did not share  
317 any similarities in their optimum fixed effect structures. The model that best explained coral  
318 recruitment (i.e. foraging rates + herbivore abundance) was in fact the worst-performing for  
319 coral settlement, resulting in a ranking lower than that of the null model (Table 2).

320 For both settlement and recruitment models, fish assemblage variables representing potential  
321 foraging impact were stronger predictors of success than observed foraging rates. Herbivore  
322 abundance had a strong positive effect on both coral settlement and recruitment, but this effect  
323 was greater and more precise for recruits ( $4.01 \pm 0.98$  SE; Table 3; Figure 5). Conversely,  
324 foraging rate showed little to no effect on either coral spat or recruits (Table 3; Figures 4-5).

325 Foraging rates in the coral settlement model was estimated as a weak negative predictor, but  
326 this does not appear to fit higher spat counts at North Reef and Resort (Figure 4). The effect of  
327 foraging rates on coral recruitment was even smaller, with little to no effect ( $0.24 \pm 0.30$  SE,  
328 Table 3; Figure 5). Trait divergence was the strongest predictor of coral settlement success with  
329 a large negative effect and appeared to best explain variation in spat counts ( $-7.69 \pm 2.31$  SE;  
330 Table 3; Figure 4). Trait richness also had a negative effect on coral settlement but like  
331 foraging rates, it too did not capture higher spat counts at North Reef and Resort (Figure 4).

332

## 333 **Discussion**

334 Our results add nuance to the potential role of fish assemblages in coral settlement and  
335 recruitment success. Previous studies have suggested that fish assemblages aid reef recovery  
336 by facilitating coral juvenile success through their foraging impacts (Bellwood et al. 2006;

337 Hughes et al. 2007; Cheal et al. 2010; Adam et al. 2011; Rasher et al. 2012). We found that  
338 coral settlement and recruitment both responded positively to herbivore abundance, but there  
339 was little evidence to support effects of benthic forager abundance or foraging rates. We  
340 detected an effect of trait diversity of fish assemblages on coral settlement, specifically trait  
341 divergence and richness. Of the two trait diversity metrics, divergence best explained the  
342 variation in coral settlement patterns (Figure 4; Table 3). Our findings of fish foraging impacts  
343 reveals that while herbivore abundance remains an important predictor for both coral  
344 settlement and recruitment success, settlement is highest where assemblages with fewer  
345 specialist traits occur.

346 While the modelled positive effects of herbivore abundance aligned with our initial prediction,  
347 we did not anticipate lower predictive power than trait diversity metrics for settlement  
348 compared with its performance in the recruitment model. This suggests that coral settlement  
349 may be highly sensitive to differences in trait diversity than herbivore abundance. One  
350 potential explanation for the differing response to trait diversity in coral settlement to  
351 recruitment may be due to recruits having greater energetic stores to overcome or compensate  
352 for sub-optimal growth conditions (Ritson-Williams et al. 2009; Doropoulos et al. 2012). This  
353 ability to withstand a certain period of sub-lethal inhibition by algae or even deleterious bites  
354 from fish is a likely reason for a spectrum of foraging impacts that can result in similar  
355 recruitment outcomes.

356 We detected overall stronger effects from assemblage diversity predictors, which represent  
357 potential foraging impact, rather than observed foraging rates (Table 3). From both a  
358 theoretical and behavioural standpoint, co-occurrence does not necessitate biotic interaction,



359 and so we couldn't assume all present fish observed were actively foraging in the area  
360 (Blanchet et al. 2020). As such, we expected foraging rates to have had greater effect sizes than  
361 assemblage diversity metrics. The lack of predictive power in observed foraging rates may be  
362 due to highly clustered distributions of foraging sessions, selective patchy foraging across  
363 space, or the influence of gregarious foraging behaviours (Hoey and Bellwood 2009; Michael  
364 et al. 2013; Streit et al. 2019), resulting in a poor representation of the foraging occurring  
365 across each study site. Hence, we advocate inclusion of both bite observations and assemblage  
366 diversity metrics to better capture site-level foraging impacts from reef fish assemblages in  
367 future studies.

368 Settlement success in this study was lower with fish assemblages that had higher trait  
369 divergence (Figure 4b) i.e. more specialists, even when high herbivore abundances were  
370 accounted for. This result was in contrast with our hypothesis, and somewhat counterintuitive,  
371 because many centrally located detritivores are conventionally considered reducers of algal  
372 turf sediment load rather than effective substrate-clearing foragers (Purcell and Bellwood 1993;  
373 Tebbett et al. 2017). One possible reason for the sensitivity to trait differences in settlement is  
374 that trait specialist herbivores have an initial harmful effect on spat. Our findings suggest that  
375 beneficial foraging impacts declined when some specialists were present, possibly due to direct  
376 consumption of spat. Spat survival can be negatively correlated to the biomass of grazing fishes  
377 (especially parrotfishes) or their feeding scars (Mumby 2009; Baria et al. 2010; Penin et al.  
378 2011; Trapon et al. 2013a, 2013b).

379 Excavating and scraping parrotfishes, two feeding modes that are located in the outer extremes  
380 of the trait space (Figure 2), have been suggested to be the most disruptive to coral settlement

381 success due to incidental grazing of recently settled corals (Mumby 2009; Trapon et al. 2013b).  
382 These grazing fish are one reason settlement success is often greater in structurally complex  
383 areas with small crevices where spat can be protected (Nozawa 2012; Brandl et al. 2014;  
384 Doropoulos et al. 2016; Gallagher and Doropoulos 2017). Conversely, Brandl et al. (2014)  
385 reported facilitative foraging impacts from *Siganus* spp., a group of crevice feeding algal  
386 croppers that are also trait specialists in our study. The abundance of algal croppers was also  
387 high at the site with the highest spat counts even though our methods cannot ascertain effects  
388 from species or groups (North Reef; Figure 2). While fewer excavators or scrapers is a likely  
389 explanation for increased settlement, we do acknowledge that our study design does not factor  
390 how fish foraging impacts on corals may vary in different topographical surroundings. And  
391 indeed, studies do argue that foraging benefits to coral juveniles from abundant herbivores  
392 overall outweigh these risks of incidental grazing mortality (Bozec et al. 2015; Graham et al.  
393 2015).

394 In this study, we emphasise the importance of top-down effects from fish assemblages on coral  
395 juvenile success. While herbivore abundance remains an important predictor, not all herbivores  
396 lend the same facilitative foraging impacts to coral spat and recruits. Especially for coral  
397 settlement, it is a less predictive, “broad stroke” metric compared to trait divergence, which  
398 captures the sensitivity of spat to specialist foragers. This sensitivity to highly trait  
399 differentiated fish assemblages puts forth one possible mechanism behind the spatial  
400 heterogeneity of coral recovery, as these specialists preferentially feed at reef slopes and crests  
401 (Hoey and Bellwood 2008; Carlson et al. 2017). While previous studies have emphasised  
402 focusing on fishery management of species that lend the greatest foraging impacts, we show

403 here that management that prioritises a biodiverse assemblage with high herbivore abundance  
404 can facilitate coral recovery best.

405

## 406 **Acknowledgments**

407 We thank the Lizard Island Research Station staff for their support. This study was conducted  
408 under a GBRMPA research permit G15/38127.1 valid from 4 December 2015 to 30 January  
409 2022. Funding was provided by the Warman Foundation (to MD and JSM), the John  
410 Templeton Foundation (MD, JSM grant #60501 'Putting the Extended Evolutionary Synthesis  
411 to the Test'), a Royal Society research grant and a Leverhulme fellowship, the Leverhulme  
412 Trust Research Centre—the Leverhulme Centre for Anthropocene Biodiversity and a  
413 Leverhulme Research Grant (RPG-2019-402, MD), a National Science Foundation—Natural  
414 Environment Research Council Biological Oceanography grant (1948946) (JSM, MD), two  
415 Ian Potter Doctoral Fellowships at Lizard Island Research Station (DTP and VB) and MASTS  
416 small grant to VB.

417

## 418 **Data availability**

419 The associated research data and analysis code can be found in GitHub  
420 (<https://github.com/cherfychow/FishTraitxCoralRec>).

421

## 422 **Conflict of interest statement**

423 The authors of this paper declare that there is no conflict of interest.

424

## 425 **References**

- 426 Adam TC, Duran A, Fuchs CE, Roycroft MV, Rojas MC, Ruttenberg BI, Burkepile DE (2018)  
427 Comparative analysis of foraging behavior and bite mechanics reveals complex functional  
428 diversity among Caribbean parrotfishes. *Marine Ecology Progress Series* 597:207–220
- 429 Adam TC, Schmitt RJ, Holbrook SJ, Brooks AJ, Edmunds PJ, Carpenter RC, Bernardi G (2011)  
430 Herbivory, Connectivity, and Ecosystem Resilience: Response of a Coral Reef to a  
431 Large-Scale Perturbation. *PLOS ONE* 6:e23717
- 432 Adjeroud M, Kayal M, Penin L (2017) Importance of Recruitment Processes in the Dynamics  
433 and Resilience of Coral Reef Assemblages. In: Rossi S., Bramanti L., Gori A., Orejas C.  
434 (eds) *Marine Animal Forests*. Springer International Publishing, Cham, pp 549–569
- 435 Bach LL, Saunders BJ, Newman SJ, Holmes TH, Harvey ES (2019) Cross and long-shore  
436 variations in reef fish assemblage structure and implications for biodiversity management.  
437 *Estuarine, Coastal and Shelf Science* 218:246–257
- 438 Bak RPM, Engel MS (1979) Distribution, abundance and survival of juvenile hermatypic  
439 corals (Scleractinia) and the importance of life history strategies in the parent coral  
440 community. *Marine Biology* 54:341–352
- 441 Baria MVB, Guest JR, Edwards AJ, Aliño PM, Heyward AJ, Gomez ED (2010) Caging  
442 enhances post-settlement survival of juveniles of the scleractinian coral *Acropora tenuis*.  
443 *Journal of Experimental Marine Biology and Ecology* 394:149–153
- 444 Bartoń K (2020) MuMIn: Multi-Model Inference.
- 445 Bates D, Mächler M, Bolker B, Walker S (2015) Fitting Linear Mixed-Effects Models Using  
446 lme4. *Journal of Statistical Software* 67:1–48
- 447 Bellwood DR, Hughes TP, Hoey AS (2006) Sleeping Functional Group Drives Coral-Reef  
448 Recovery. *Current Biology* 16:2434–2439
- 449 Blanchet FG, Cazelles K, Gravel D (2020) Co-occurrence is not evidence of ecological  
450 interactions. *Ecology Letters* 23:1050–1063
- 451 Boettiger C, Lang DT, Wainwright P (2012) rfishbase: exploring, manipulating and visualizing  
452 FishBase data from R. *Journal of Fish Biology*
- 453 Bozec Y-M, Alvarez-Filip L, Mumby PJ (2015) The dynamics of architectural complexity on  
454 coral reefs under climate change. *Global Change Biology* 21:223–235
- 455 Bozec Y-M, Doropoulos C, Roff G, Mumby PJ (2019) Transient Grazing and the Dynamics of  
456 an Unanticipated Coral–Algal Phase Shift. *Ecosystems* 22:296–311
- 457 Brandl SJ, Hoey AS, Bellwood DR (2014) Micro-topography mediates interactions between  
458 corals, algae, and herbivorous fishes on coral reefs. *Coral Reefs* 33:421–430
- 459 Brandl SJ, Rasher DB, Côté IM, Casey JM, Darling ES, Lefcheck JS, Duffy JE (2019) Coral  
460 reef ecosystem functioning: eight core processes and the role of biodiversity. *Frontiers in*  
461 *Ecology and the Environment* 17:445–454
- 462 Bruno JF, Sweatman H, Precht WF, Selig ER, Schutte VGW (2009) Assessing evidence of  
463 phase shifts from coral to macroalgal dominance on coral reefs. *Ecology* 90:1478–1484
- 464 Burkepile DE, Hay ME (2008) Herbivore species richness and feeding complementarity affect  
465 community structure and function on a coral reef. *PNAS* 105:16201–16206
- 466 Burkepile DE, Hay ME (2010) Impact of Herbivore Identity on Algal Succession and Coral  
467 Growth on a Caribbean Reef. *PLOS ONE* 5:e8963

- 468 Burkepile DE, Hay ME (2011) Feeding complementarity versus redundancy among  
469 herbivorous fishes on a Caribbean reef. *Coral Reefs* 30:351–362
- 470 Burnham KP, Anderson DR (2002) Model selection and multimodel inference : a practical  
471 information-theoretic approach.
- 472 Carlson PM, Davis K, Warner RR, Caselle JE (2017) Fine-scale spatial patterns of parrotfish  
473 herbivory are shaped by resource availability. *Marine Ecology Progress Series* 577:165–176
- 474 Chadwick NE, Morrow KM (2011) Competition among sessile organisms on coral reefs. *Coral*  
475 *Reefs: an ecosystem in transition*. Springer, pp 347–371
- 476 Cheal A, Emslie M, Miller I, Sweatman H (2012) The distribution of herbivorous fishes on the  
477 Great Barrier Reef. *Mar Biol* 159:1143–1154
- 478 Cheal AJ, MacNeil MA, Cripps E, Emslie MJ, Jonker M, Schaffelke B, Sweatman H (2010)  
479 Coral–macroalgal phase shifts or reef resilience: links with diversity and functional roles of  
480 herbivorous fishes on the Great Barrier Reef. *Coral Reefs* 29:1005–1015
- 481 Chong-Seng KM, Nash KL, Bellwood DR, Graham NAJ (2014) Macroalgal herbivory on  
482 recovering versus degrading coral reefs. *Coral Reefs* 33:409–419
- 483 Dajka J-C, Wilson SK, Robinson JPW, Chong-Seng KM, Harris A, Graham NAJ (2019)  
484 Uncovering drivers of juvenile coral density following mass bleaching. *Coral Reefs*  
485 38:637–649
- 486 Darling ES, Graham NAJ, Januchowski-Hartley FA, Nash KL, Pratchett MS, Wilson SK (2017)  
487 Relationships between structural complexity, coral traits, and reef fish assemblages. *Coral*  
488 *Reefs* 36:561–575
- 489 Diaz-Pulido G, Harii S, McCook LJ, Hoegh-Guldberg O (2010) The impact of benthic algae on  
490 the settlement of a reef-building coral. *Coral Reefs* 29:203–208
- 491 Doropoulos C, Roff G, Bozec Y-M, Zupan M, Werninghausen J, Mumby PJ (2016)  
492 Characterizing the ecological trade-offs throughout the early ontogeny of coral recruitment.  
493 *Ecological Monographs* 86:20–44
- 494 Doropoulos C, Roff G, Visser M-S, Mumby PJ (2017) Sensitivity of coral recruitment to subtle  
495 shifts in early community succession. *Ecology* 98:304–314
- 496 Doropoulos C, Ward S, Marshall A, Diaz-Pulido G, Mumby PJ (2012) Interactions among  
497 chronic and acute impacts on coral recruits: the importance of size-escape thresholds.  
498 *Ecology* 93:2131–2138
- 499 Eakin CM, Sweatman HPA, Brainard RE (2019) The 2014–2017 global-scale coral bleaching  
500 event: insights and impacts. *Coral Reefs* 38:539–545
- 501 Elliott J, Patterson M, Summers N, Miteronique C, Montocchio E, Vitry E (2016) How does the  
502 proliferation of the coral-killing sponge *Terpios hoshinota* affect benthic community  
503 structure on coral reefs? *Coral Reefs* 35:1083–1095
- 504 Fontana S, Petchey OL, Pomati F (2016) Individual-level trait diversity concepts and indices to  
505 comprehensively describe community change in multidimensional trait space. *Functional*  
506 *Ecology* 30:808–818
- 507 Gallagher C, Doropoulos C (2017) Spatial refugia mediate juvenile coral survival during  
508 coral–predator interactions. *Coral Reefs* 36:51–61
- 509 Graham NA, Bellwood DR, Cinner JE, Hughes TP, Norström AV, Nyström M (2013)  
510 Managing resilience to reverse phase shifts in coral reefs. *Frontiers in Ecology and the*  
511 *Environment* 11:541–548

- 512 Graham NAJ, Jennings S, MacNeil MA, Mouillot D, Wilson SK (2015) Predicting  
513 climate-driven regime shifts versus rebound potential in coral reefs. *Nature* 518:94–97
- 514 Green AL, Bellwood DR (2009) Monitoring functional groups of herbivorous reef fishes as  
515 indicators of coral reef resilience: a practical guide for coral reef managers in the Asia  
516 Pacific region. IUCN, Gland, Switzerland
- 517 Hata T, Madin JS, Cumbo VR, Denny M, Figueiredo J, Harii S, Thomas CJ, Baird AH (2017)  
518 Coral larvae are poor swimmers and require fine-scale reef structure to settle. *Sci Rep*  
519 7:2249
- 520 Heyward A, Negri A (1999) Natural inducers for coral larval metamorphosis. *Coral reefs*  
521 18:273–279
- 522 Hoey AS (2018) Feeding in parrotfishes: The influence of species, body size, and temperature.  
523 *Biology of parrotfishes*. CRC Press, pp 119–133
- 524 Hoey AS, Bellwood DR (2008) Cross-shelf variation in the role of parrotfishes on the Great  
525 Barrier Reef. *Coral Reefs* 27:37–47
- 526 Hoey AS, Bellwood DR (2009) Limited Functional Redundancy in a High Diversity System:  
527 Single Species Dominates Key Ecological Process on Coral Reefs. *Ecosystems* 12:1316–  
528 1328
- 529 Hoey AS, Bellwood DR (2011) Suppression of herbivory by macroalgal density: a critical  
530 feedback on coral reefs? *Ecology Letters* 14:267–273
- 531 Holbrook SJ, Adam TC, Edmunds PJ, Schmitt RJ, Carpenter RC, Brooks AJ, Lenihan HS,  
532 Briggs CJ (2018) Recruitment Drives Spatial Variation in Recovery Rates of Resilient Coral  
533 Reefs. *Scientific Reports* 8:7338
- 534 Hughes TP (1994) Catastrophes, Phase Shifts, and Large-Scale Degradation of a Caribbean  
535 Coral Reef. *Science* 265:1547–1551
- 536 Hughes TP, Anderson KD, Connolly SR, Heron SF, Kerry JT, Lough JM, Baird AH, Baum JK,  
537 Berumen ML, Bridge TC, Claar DC, Eakin CM, Gilmour JP, Graham NAJ, Harrison H,  
538 Hobbs J-PA, Hoey AS, Hoogenboom M, Lowe RJ, McCulloch MT, Pandolfi JM, Pratchett  
539 M, Schoepf V, Torda G, Wilson SK (2018) Spatial and temporal patterns of mass bleaching  
540 of corals in the Anthropocene. *Science* 359:80–83
- 541 Hughes TP, Kerry JT, Álvarez-Noriega M, Álvarez-Romero JG, Anderson KD, Baird AH,  
542 Babcock RC, Beger M, Bellwood DR, Berkelmans R, Bridge TC, Butler IR, Byrne M,  
543 Cantin NE, Comeau S, Connolly SR, Cumming GS, Dalton SJ, Diaz-Pulido G, Eakin CM,  
544 Figueira WF, Gilmour JP, Harrison HB, Heron SF, Hoey AS, Hobbs J-PA, Hoogenboom  
545 MO, Kennedy EV, Kuo C, Lough JM, Lowe RJ, Liu G, McCulloch MT, Malcolm HA,  
546 McWilliam MJ, Pandolfi JM, Pears RJ, Pratchett MS, Schoepf V, Simpson T, Skirving WJ,  
547 Sommer B, Torda G, Wachenfeld DR, Willis BL, Wilson SK (2017) Global warming and  
548 recurrent mass bleaching of corals. *Nature* 543:373–377
- 549 Hughes TP, Kerry JT, Baird AH, Connolly SR, Chase TJ, Dietzel A, Hill T, Hoey AS,  
550 Hoogenboom MO, Jacobson M, Kerswell A, Madin JS, Mieog A, Paley AS, Pratchett MS,  
551 Torda G, Woods RM (2019) Global warming impairs stock–recruitment dynamics of corals.  
552 *Nature* 568:387–390
- 553 Hughes TP, Rodrigues MJ, Bellwood DR, Ceccarelli D, Hoegh-Guldberg O, McCook L,  
554 Moltschaniwskyj N, Pratchett MS, Steneck RS, Willis B (2007) Phase Shifts, Herbivory,  
555 and the Resilience of Coral Reefs to Climate Change. *Current Biology* 17:360–365



- 556 Korzen L, Israel A, Abelson A (2011) Grazing Effects of Fish versus Sea Urchins on Turf  
557 Algae and Coral Recruits: Possible Implications for Coral Reef Resilience and Restoration.  
558 <https://www.hindawi.com/journals/jmb/2011/960207/>
- 559 Kuempel CD, Altieri AH (2017) The emergent role of small-bodied herbivores in pre-empting  
560 phase shifts on degraded coral reefs. *Scientific reports* 7:39670
- 561 Kuffner IB, Walters LJ, Becerro MA, Paul VJ, Ritson-Williams R, Beach KS (2006) Inhibition  
562 of coral recruitment by macroalgae and cyanobacteria. *Marine Ecology Progress Series*  
563 323:107–117
- 564 Laliberté E, Legendre P (2010) A distance-based framework for measuring functional diversity  
565 from multiple traits. *Ecology* 91:299–305
- 566 Laliberté E, Legendre P, Shipley B (2014) FD: measuring functional diversity from multiple  
567 traits, and other tools for functional ecology.
- 568 Langlois T, Williams J, Monk J, Bouchet P, Currey L, Goetze J, Harasti D, Huveneers C,  
569 Lerodiasconou D, Malcolm H, Whitmarsh S (2018) *Marine Sampling Field Manual for*  
570 *Benthic Stereo BRUVS (Baited Remote Underwater Videos) [Version 1]*.
- 571 Legendre P, Legendre L (2012) Chapter 9 - Ordination in reduced space. In: Legendre P.,  
572 Legendre L. (eds) *Developments in Environmental Modelling*. Elsevier, pp 425–520
- 573 Legras G, Loiseau N, Gaertner J-C (2018) Functional richness: Overview of indices and  
574 underlying concepts. *Acta Oecologica* 87:34–44
- 575 Madduppa H, Schupp PJ, Faisal MR, Sastria MY, Thoms C (2017) Persistent outbreaks of the  
576 “black disease” sponge *Terpios hoshinota* in Indonesian coral reefs. *Mar Biodiv* 47:149–  
577 151
- 578 Madin JS, Baird AH, Bridge TCL, Connolly SR, Zawada KJA, Dornelas M (2018) Cumulative  
579 effects of cyclones and bleaching on coral cover and species richness at Lizard Island.  
580 *Marine Ecology Progress Series* 604:263–268
- 581 Manikandan B, Ravindran J, Vidya PJ, Shrinivasu S, Manimurali R, Paramasivam K (2017)  
582 Resilience potential of an Indian Ocean reef: an assessment through coral recruitment  
583 pattern and survivability of juvenile corals to recurrent stress events. *Environ Sci Pollut Res*  
584 24:13614–13625
- 585 Mantyka CS, Bellwood DR (2007) Macroalgal grazing selectivity among herbivorous coral  
586 reef fishes. *Marine Ecology Progress Series* 352:177–185
- 587 Mason NWH, Mouillot D, Lee WG, Wilson JB (2005) Functional richness, functional  
588 evenness and functional divergence: the primary components of functional diversity. *Oikos*  
589 111:112–118
- 590 McClanahan T, Muthiga N, Mangi S (2001) Coral and algal changes after the 1998 coral  
591 bleaching: interaction with reef management and herbivores on Kenyan reefs. *Coral Reefs*  
592 19:380–391
- 593 McCook L, Jompa J, Diaz-Pulido G (2001) Competition between corals and algae on coral  
594 reefs: a review of evidence and mechanisms. *Coral Reefs* 19:400–417
- 595 Mellin C, Thompson A, Jonker MJ, Emslie MJ (2019) Cross-Shelf Variation in Coral  
596 Community Response to Disturbance on the Great Barrier Reef. *Diversity* 11:38
- 597 Michael PJ, Hyndes GA, Vanderklift MA, Vergés A (2013) Identity and behaviour of  
598 herbivorous fish influence large-scale spatial patterns of macroalgal herbivory in a coral  
599 reef. *Marine Ecology Progress Series* 482:227–240

- 600 Mumby PJ (2009) Herbivory versus corallivory: are parrotfish good or bad for Caribbean coral  
601 reefs? *Coral Reefs* 28:683–690
- 602 Nozawa Y (2012) Effective size of refugia for coral spat survival. *Journal of Experimental*  
603 *Marine Biology and Ecology* 413:145–149
- 604 Penin L, Michonneau F, Carroll A, Adjeroud M (2011) Effects of predators and grazers  
605 exclusion on early post-settlement coral mortality. *Hydrobiologia* 663:259–264
- 606 Pizarro O, Friedman A, Bryson M, Williams SB, Madin J (2017) A simple, fast, and repeatable  
607 survey method for underwater visual 3D benthic mapping and monitoring. *Ecology and*  
608 *Evolution* 7:1770–1782
- 609 Podani J (1999) Extending Gower’s general coefficient of similarity to ordinal characters.  
610 *Taxon* 48:331–340
- 611 Polunin NVC, Klumpp DW (1992) Algal food supply and grazer demand in a very productive  
612 coral-reef zone. *Journal of Experimental Marine Biology and Ecology* 164:1–15
- 613 Purcell SW, Bellwood DR (1993) A functional analysis of food procurement in two  
614 surgeonfish species, *Acanthurus nigrofuscus* and *Ctenochaetus striatus* (Acanthuridae).  
615 *Environmental Biology of Fishes* 37:139–159
- 616 R Core Team (2020) R: A Language and Environment for Statistical Computing. R Foundation  
617 for Statistical Computing, Vienna, Austria
- 618 Rasher DB, Engel S, Bonito V, Fraser GJ, Montoya JP, Hay ME (2012) Effects of herbivory,  
619 nutrients, and reef protection on algal proliferation and coral growth on a tropical reef.  
620 *Oecologia* 169:187–198
- 621 Rasher DB, Hoey AS, Hay ME (2013) Consumer diversity interacts with prey defenses to drive  
622 ecosystem function. *Ecology* 94:1347–1358
- 623 Richardson LE, Graham NAJ, Pratchett MS, Hoey AS (2017) Structural complexity mediates  
624 functional structure of reef fish assemblages among coral habitats. *Environ Biol Fish*  
625 100:193–207
- 626 Ritson-Williams R, Arnold S, Fogarty N, Steneck RS, Vermeij M, Paul VJ (2009) New  
627 perspectives on ecological mechanisms affecting coral recruitment on reefs. *Smithsonian*  
628 *Contributions to the Marine Sciences* 437–457
- 629 Roelfsema CM, Saunders MI, Canto RFC, Leon JX, Phinn SR, Hamylton S (2014) Habitat  
630 Map for Lizard Island reef, Australia derived from a photo-transect survey field data  
631 collected in December 2011 and September/October 2012. Supplement to: Saunders,  
632 Megan I; Bayraktarov, Elisa; Roelfsema, Christiaan M; Leon, Javier X; Samper-Villarreal,  
633 Jimena; Phinn, Stuart R; Lovelock, Catherine E; Mumby, Peter J (2015): Spatial and  
634 temporal variability of seagrass at Lizard Island, Great Barrier Reef *Botanica Marina*, 58(1),  
635 35-49, <https://doi.org/10.1515/bot-2014-0060>
- 636 Roff G, Mumby PJ (2012) Global disparity in the resilience of coral reefs. *Trends in Ecology &*  
637 *Evolution* 27:404–413
- 638 Rogers CS, Miller J (2006) Permanent “phase shifts” or reversible declines in coral cover?  
639 Lack of recovery of two coral reefs in St. John, US Virgin Islands. *Marine Ecology Progress*  
640 *Series* 306:103–114
- 641 Skirving WJ, Heron SF, Marsh BL, Liu G, De La Cour JL, Geiger EF, Eakin CM (2019) The  
642 relentless march of mass coral bleaching: a global perspective of changing heat stress. *Coral*  
643 *Reefs* 38:547–557



- 644 Streit RP, Cumming GS, Bellwood DR (2019) Patchy delivery of functions undermines  
645 functional redundancy in a high diversity system. *Functional Ecology* 33:1144–1155
- 646 Streit RP, Hoey AS, Bellwood DR (2015) Feeding characteristics reveal functional distinctions  
647 among browsing herbivorous fishes on coral reefs. *Coral Reefs* 34:1037–1047
- 648 Stuart-Smith RD, Bates AE, Lefcheck JS, Duffy JE, Baker SC, Thomson RJ, Stuart-Smith JF,  
649 Hill NA, Kininmonth SJ, Airoidi L, Becerro MA, Campbell SJ, Dawson TP, Navarrete SA,  
650 Soler GA, Strain EMA, Willis TJ, Edgar GJ (2013) Integrating abundance and functional  
651 traits reveals new global hotspots of fish diversity. *Nature* 501:539–542
- 652 Tebbett SB, Goatley CHR, Bellwood DR (2017) Clarifying functional roles: algal removal by  
653 the surgeonfishes *Ctenochaetus striatus* and *Acanthurus nigrofuscus*. *Coral Reefs* 36:803–  
654 813
- 655 Torres-Pulliza D, Dornelas MA, Pizarro O, Bewley M, Blowes SA, Boutros N, Brambilla V,  
656 Chase TJ, Frank G, Friedman A, Hoogenboom MO, Williams S, Zawada KJA, Madin JS  
657 (2020) A geometric basis for surface habitat complexity and biodiversity. *Nature Ecology &*  
658 *Evolution* 4:1495–1501
- 659 Trapon ML, Pratchett MS, Hoey AS (2013a) Spatial variation in abundance, size and  
660 orientation of juvenile corals related to the biomass of parrotfishes on the Great Barrier Reef,  
661 Australia. *PloS one* 8:e57788
- 662 Trapon ML, Pratchett MS, Hoey AS, Baird AH (2013b) Influence of fish grazing and  
663 sedimentation on the early post-settlement survival of the tabular coral *Acropora cytherea*.  
664 *Coral Reefs* 32:1051–1059
- 665 Vermeij MJA, Sandin SA (2008) Density-Dependent Settlement and Mortality Structure the  
666 Earliest Life Phases of a Coral Population. *Ecology* 89:1994–2004
- 667 Villéger S, Mason NWH, Mouillot D (2008) New Multidimensional Functional Diversity  
668 Indices for a Multifaceted Framework in Functional Ecology. *Ecology* 89:2290–2301

669

670

671 **Figure legends**

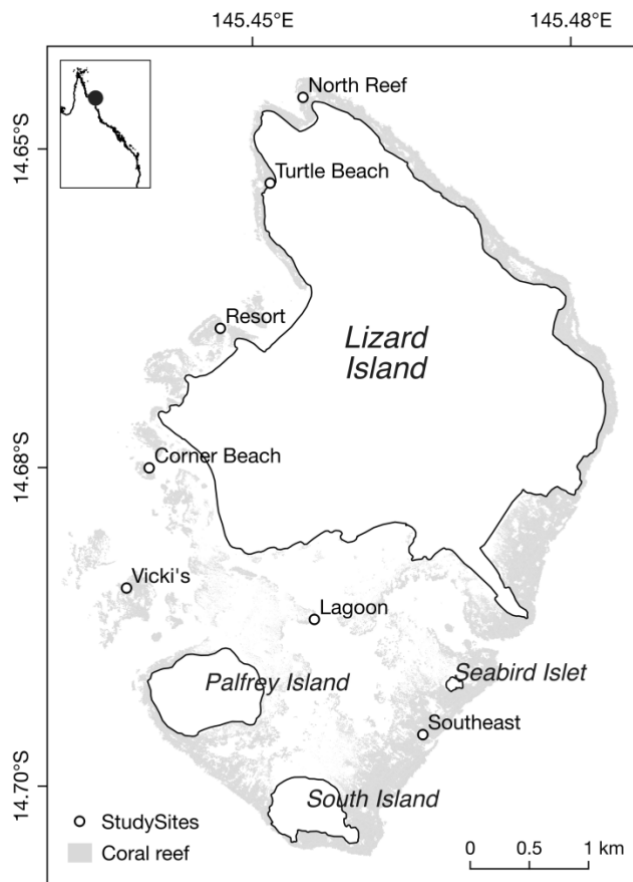

672

673 **Figure 1.** Map of study site locations around Lizard Island. The coral reef area is shown shaded

674 in light grey. Spatial data for reef and coastline boundaries were sourced from the Great Barrier

675 Reef Marine Park Authority Geoportol (GBRMPA 2020) and Roelfsema et al. (2014).

676

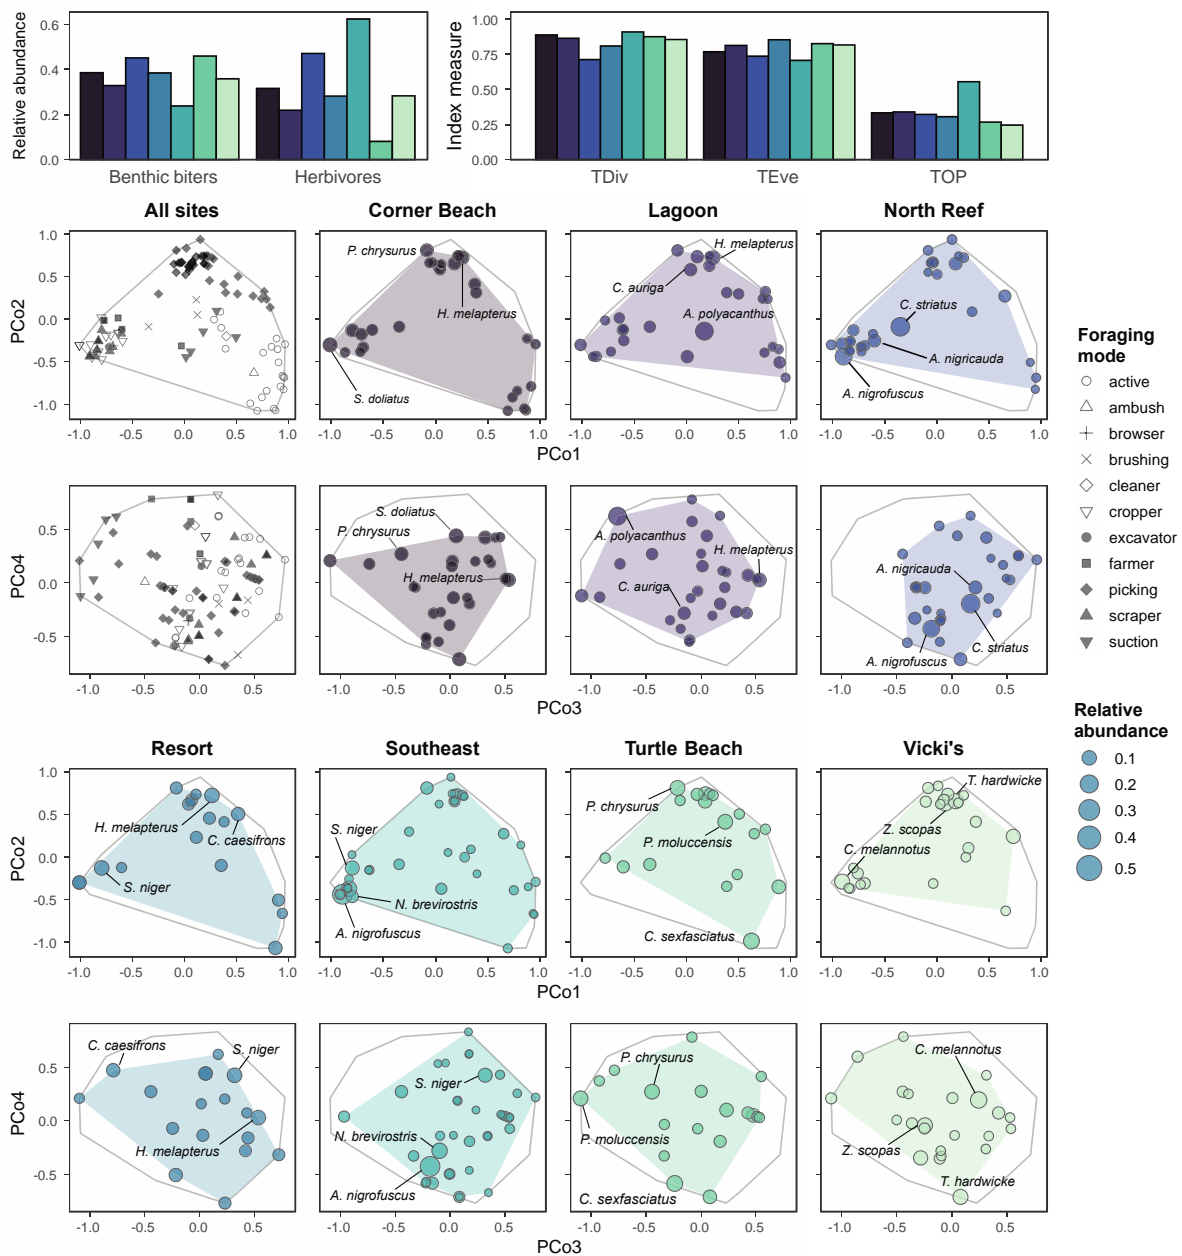

677 **Figure 2.** Trait diversity of fish assemblages at the site-level. The bar graphs (top) shows the  
 678 measures for relative fish abundance (top left) and trait diversity indices (top right) for each site:  
 679 benthic biters, herbivores, trait divergence (TDiv), trait evenness (TEve), and trait onion  
 680 peeling index (TOP). These three facets of trait diversity relate to the volume of the occupied  
 681 trait space (TOP), the regularity of species distributed within the space (TEve), and the  
 682 dispersion of the assemblage from the center of the trait space (TDiv). The array shown is a

683 representation of assemblages according to the functional traits of species. Species are  
684 represented by circles, with varying sizes by relative abundance. Distance between circles  
685 represents trait dissimilarity between species. The trait space occupied by the assemblage is  
686 shaded to represent TOP. For comparison, the reef-level trait space (i.e. all sites, representing  
687 TOP = 1) is shown as a grey outline.

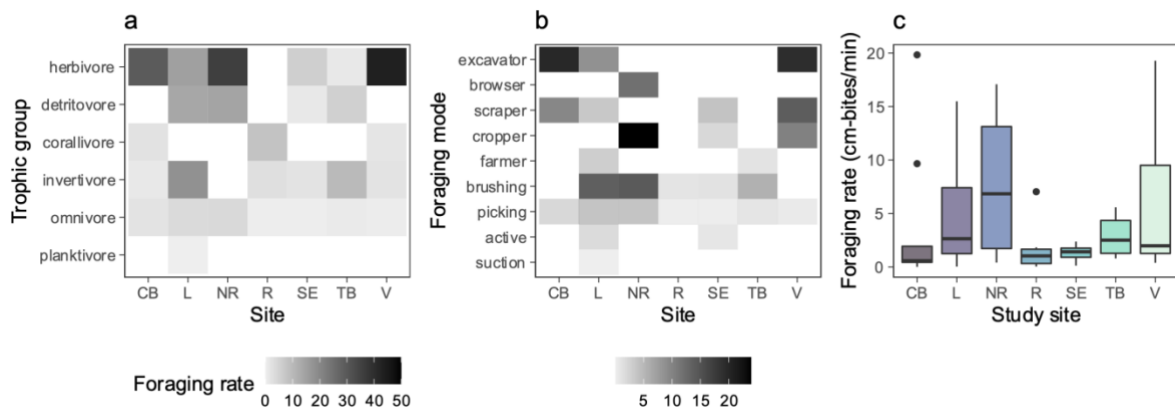

688 **Figure 3.** Observed foraging rates at each study site, Corner Beach (CB), Lagoon (L), North  
689 Reef (NR), Resort (R), Southeast (SE), Turtle Beach (TB), Vicki's (V). Foraging rates (cm  
690 bites  $\text{min}^{-1}$ ) are grouped according to contributions by trophic group (a) and foraging mode (b).  
691 Both panels (a) and (b) represent foraging rates by shading, where darker shading represents  
692 higher feeding rates and vice versa. Note differences in scales as foraging rates range from  
693 0.03-43.4 (a) and 0.03–23.9 (b). White represents absent groups from sites. Overall foraging  
694 rate distributions for species in each site are shown in (c).

695

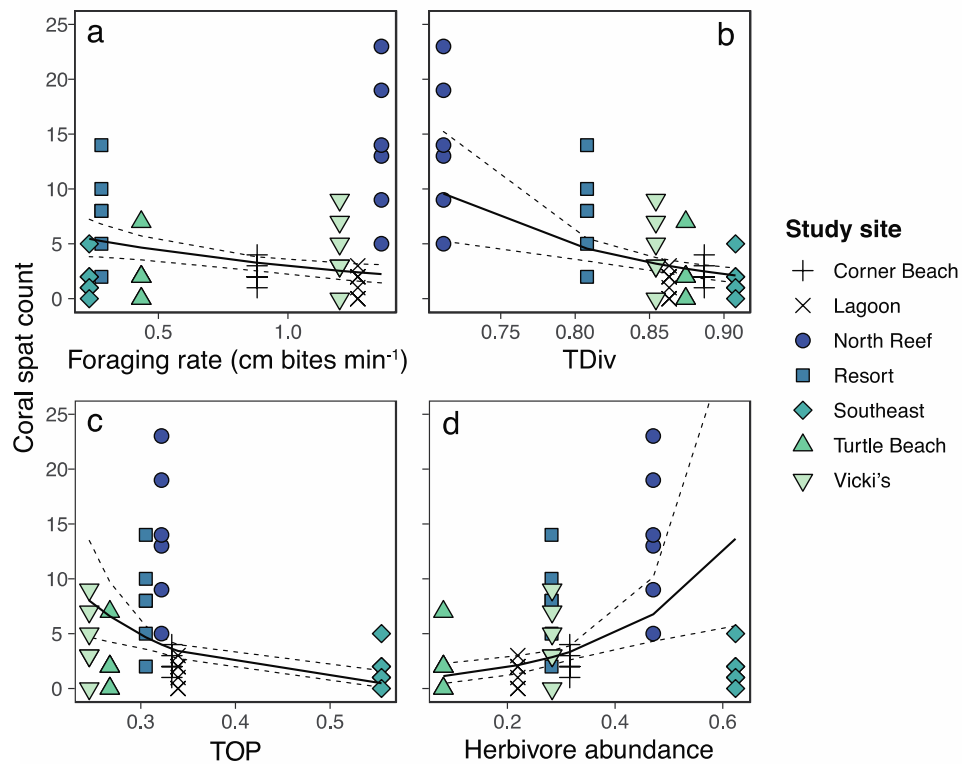

696

697 **Figure 4.** Partial predictions for the optimum model relating coral settlement with fish  
698 assemblages. This model includes the fixed effects of (a) foraging rate of fishes (cm bites  
699 min<sup>-1</sup>), (b) trait divergence, (c) trait richness (TOP), and (d) relative abundance of herbivorous  
700 fish. Foraging rate was scaled by its range. Coral spat were counted from six settlement tiles at  
701 seven sites ( $n = 42$ ). Each tile is shown in various shapes and colors by site. Partial predictions  
702 from the model for each parameter are represented by black lines with bootstrapped confidence  
703 intervals (from 999 simulations) shown with dashed lines.

704

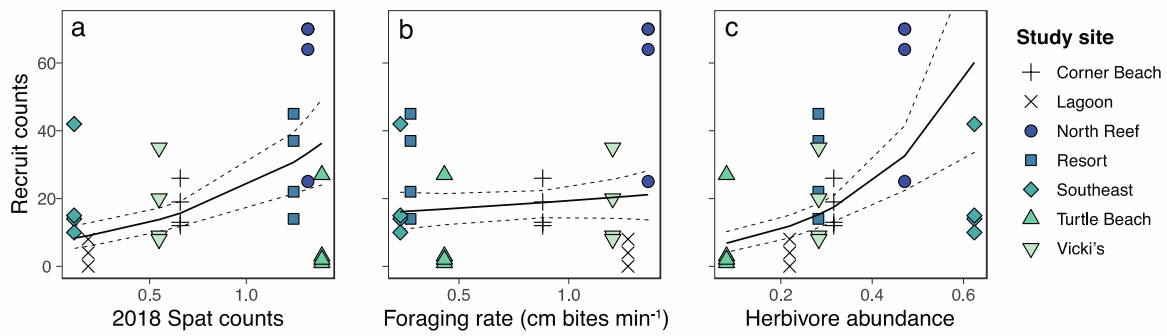

705

706 **Figure 5.** Partial predictions for the optimum coral recruitment model. This model included the

707 fixed effects of (a) spat abundances from 2018, (b) scaled foraging rate of fishes (cm bites

708 min<sup>-1</sup>), and (c) relative abundance of herbivorous fish. Both spat counts and foraging rate were

709 scaled by their range. Coral recruits were counted from four quadrants of a photomosaic for

710 each site ( $n = 28$ ) and are shown in various shapes and colours by site. Partial predictions for

711 each parameter are represented by black lines with bootstrapped confidence intervals (from

712 999 simulations) shown with dashed lines.

713

714 **Tables**

715 **Table 1.** Traits used to quantify the functional diversity of reef fish assemblages in regard to  
 716 feeding ecology, substrate interaction, and delivery of feeding functions. Values were extracted  
 717 or derived from various databases and literature.

| <b>Trait</b>                     | <b>Type</b>    | <b>Levels/units</b>                                                                                                                            | <b>Source</b>              |
|----------------------------------|----------------|------------------------------------------------------------------------------------------------------------------------------------------------|----------------------------|
| Functional group                 | Factor         | Herbivore, detritivore, planktivore, cleaner, omnivore, invertivore, piscivore                                                                 | 1, 2, 3                    |
| Foraging mode                    | Factor         | Excavator, cropper, scraper, browser, brusher, picker, farmer, suction feeder, ambush feeder, active feeder                                    | 1, 4, 5                    |
| Trophic level                    | Continuous     | 2.0–5.0                                                                                                                                        | 1                          |
| Water column position of feeding | Factor         | Pelagic, demersal, benthic                                                                                                                     | 1                          |
| Residency/Range                  | Ordered factor | Index of residency and active range, 1-5 with 1 representing highly territorial species and 5 for wide-ranging pelagic species                 | 1, 7-11                    |
| Schooling                        | Ordered factor | Index of schooling behaviours during feeding from 1-4, with 1 representing solitary species to 4 being species forming large shoals or schools | 1, 6                       |
| 1. Pauly and Froese 2019         |                | 5. Purcell and Bellwood 1993                                                                                                                   | 9. Welsh and Bellwood 2012 |
| 2. Stuart-Smith et al. 2013      |                | 6. Randall et al. 1996                                                                                                                         | 10. Pillans et al. 2014    |
| 3. Brandl and Bellwood 2014      |                | 7. Meyer and Holland 2005                                                                                                                      | 11. Davis et al. 2015      |
| 4. Green and Bellwood 2009       |                | 8. Meyer et al. 2010                                                                                                                           |                            |

718

719

720 **Table 2.** Ranking of candidate models for coral spat and recruit models. Site is included in  
 721 every candidate as a random intercept term, represented as (1|Site). Fixed effect structures vary  
 722 in fish assemblage diversity variables of trait divergence (TDiv), trait evenness (TEve), trait  
 723 richness (TOP), herbivore abundance (Herb), and benthic biter abundance (Benthic). All  
 724 candidates include foraging rates (For) and, for recruit models, spat counts from 2018. Model  
 725 candidates were ranked according to their AICc values. Top-ranked models are bolded for  
 726 emphasis. Candidates that failed to converge were omitted.

727

| <b>Models</b>                                                  | <b>AICc</b>   | <b>ΔAICc</b> | <b>Weight</b> | <b>mR<sup>2</sup></b> |
|----------------------------------------------------------------|---------------|--------------|---------------|-----------------------|
| <i>Coral settlement</i>                                        |               |              |               |                       |
| <b>For + TDiv + TOP + Herb + (1 Site)</b>                      | <b>202.68</b> | —            | <b>0.582</b>  | <b>0.639</b>          |
| For + TDiv + TEve + TOP + Herb + (1 Site)                      | 205.69        | 3.01         | 0.129         | 0.638                 |
| For + TDiv + TOP + Herb + Benthic + (1 Site)                   | 205.70        | 3.02         | 0.129         | 0.638                 |
| For + TDiv + TEve + TOP + Benthic + (1 Site)                   | 206.14        | 3.46         | 0.103         | 0.634                 |
| For + TDiv + TEve + TOP + (1 Site)                             | 208.89        | 6.21         | 0.026         | 0.566                 |
| For + TDiv + TEve + TOP + Herb + Benthic + (1 Site)            | 208.95        | 6.27         | 0.025         | 0.638                 |
| (1 Site)                                                       | 213.20        | 10.52        | 0.003         | 0                     |
| For + Herb + (1 Site)                                          | 217.48        | 14.8         | 0             | 0.069                 |
| <i>Coral recruitment</i>                                       |               |              |               |                       |
| <b>Spat2018 + For + Herb + (1 Site)</b>                        | <b>222.52</b> | —            | <b>0.560</b>  | <b>0.538</b>          |
| Spat2018 + For + Herb + Benthic + (1 Site)                     | 225.63        | 3.11         | 0.118         | 0.546                 |
| Spat2018 + For + TDiv + TOP + Herb + (1 Site)                  | 225.69        | 3.17         | 0.115         | 0.64                  |
| Spat2018 + For + TEve + TDiv + TOP + (1 Site)                  | 225.99        | 3.68         | 0.089         | 0.537                 |
| Spat2018 + For + TDiv + Herb + (1 Site)                        | 226.20        | 4.03         | 0.075         | 0.625                 |
| Spat2018 + For + TEve + TDiv + TOP + Herb + Benthic + (1 Site) | 229.82        | 7.30         | 0.015         | 0.647                 |
| Spat2018 + For + TDiv + TOP + Herb + Benthic + (1 Site)        | 229.82        | 7.30         | 0.015         | 0.647                 |
| Spat2018 + For + TEve + TDiv + TOP + Benthic + (1 Site)        | 229.82        | 7.30         | 0.015         | 0.647                 |

728



729

730 **Table 3.** Parameter estimates of selected models exploring the relationship of coral juveniles  
731 with fish assemblage foraging rates, trait divergence (TDiv), trait richness (trait onion peeling  
732 index, TOP), and herbivore abundance. Effect estimates are shown with their respective  
733 standard error and coefficient of variation. Estimates marked with asterisks (\*) are significant  
734 ( $p < 0.01$ ).

| <b>Parameter</b>        | <b>Effect estimate</b> | <b>CV</b> | <b>Parameter</b>         | <b>Effect estimate</b> | <b>CV</b> |
|-------------------------|------------------------|-----------|--------------------------|------------------------|-----------|
| <i>Coral settlement</i> |                        |           | <i>Coral recruitment</i> |                        |           |
| Intercept               | 9.94 ± 1.74            | * .175    | Intercept                | 0.48 ± 0.59            | 1.232     |
| ForagingRate            | -0.79 ± 0.30           | * .380    | Spat2018                 | 1.15 ± 0.32            | * .278    |
| TDiv                    | -7.69 ± 2.31           | * .300    | ForagingRate             | 0.24 ± 0.30            | 1.250     |
| TOP                     | -9.07 ± 3.32           | * .366    | Herbivore                | 4.01 ± 0.98            | * .244    |
| Herbivore               | 4.59 ± 1.82            | * .397    |                          |                        |           |
